# Supplementary material for: The nuclear factor ID3 endows macrophages with a potent anti-tumour activity
Source: PubMed Central journal article supplement (PMC10881399; doi:10.1038/s41586-023-06950-4), 2024-02-07
Supplement: 41586_2023_6950_MOESM1_ESM.pdf [file 41586_2023_6950_MOESM1_ESM.pdf]

## Supplementary information

---

# The nuclear factor ID3 endows macrophages with a potent anti-tumour activity

---

In the format provided by the authors and unedited

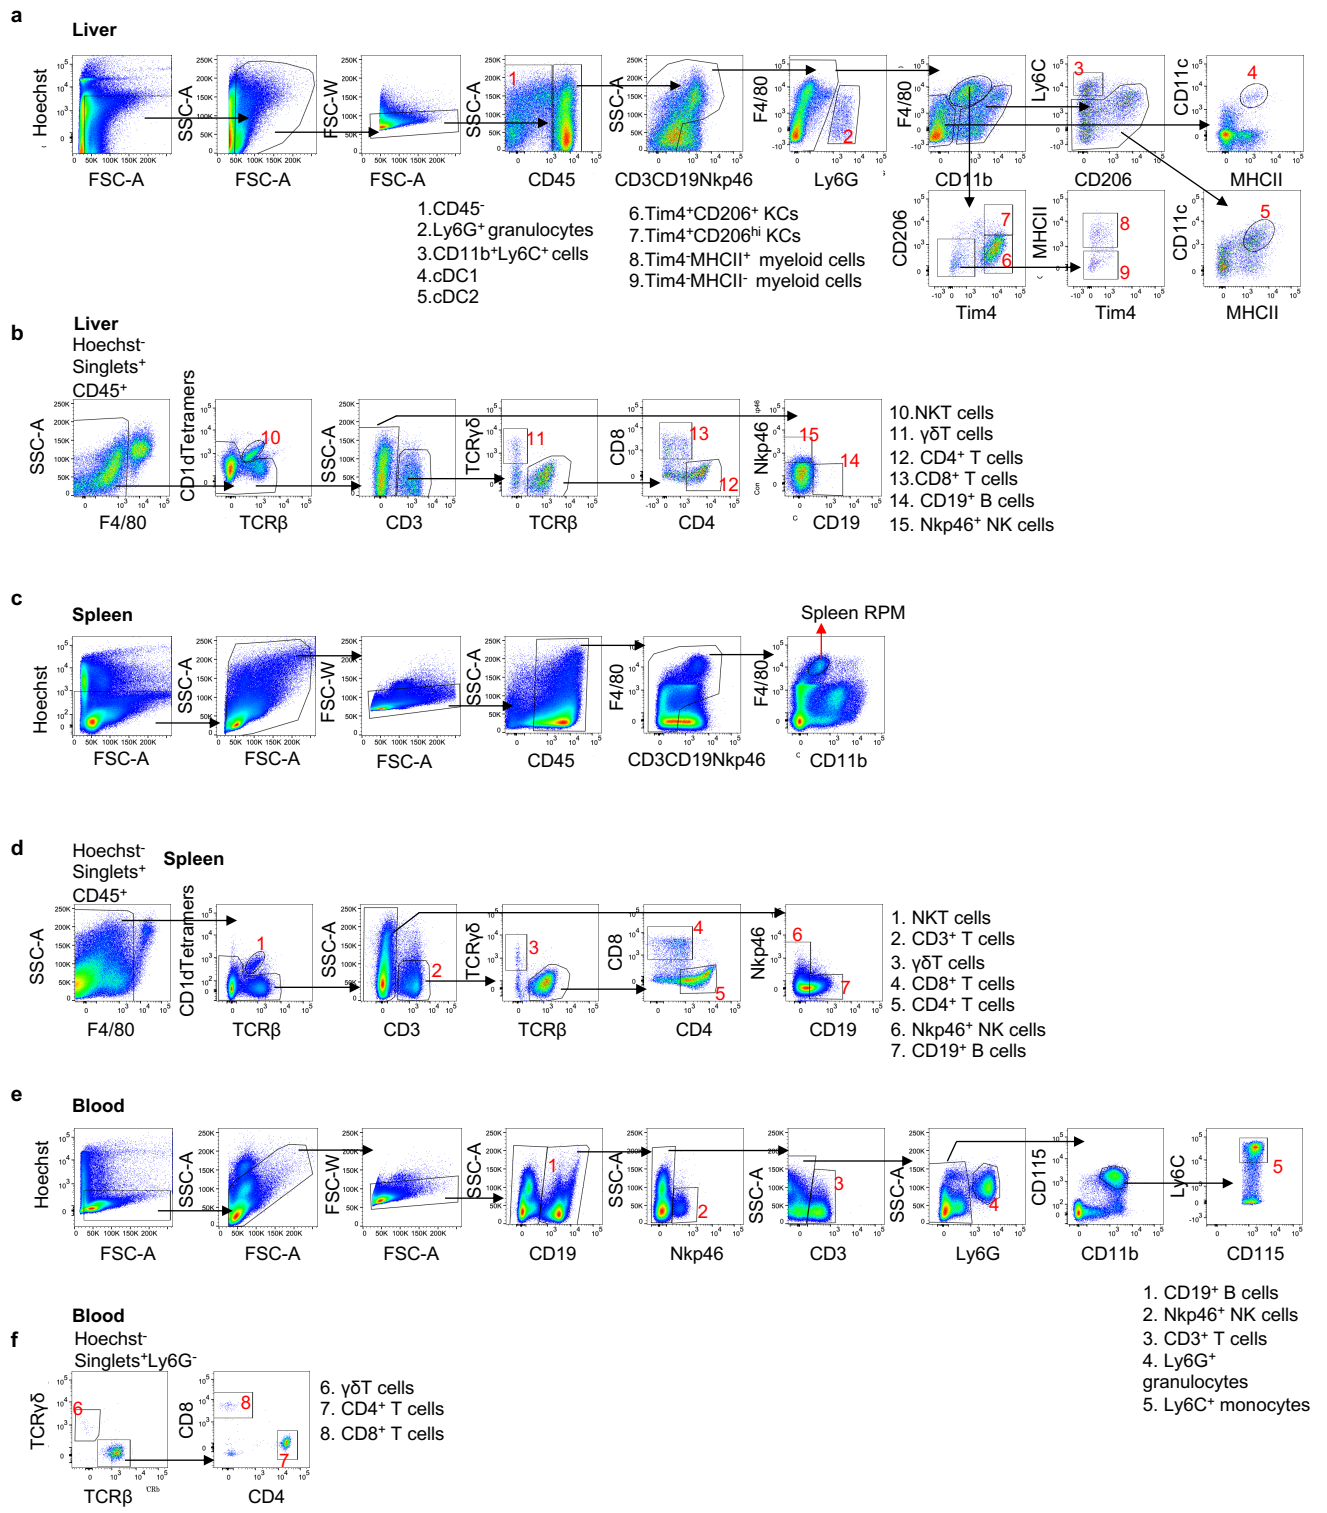

**Supplementary information figure 1. Flow cytometry gating strategies for immune cells in liver, spleen, and blood.** a,b- Representative gating strategies for liver CD45<sup>+</sup> cells, Ly6G<sup>+</sup> granulocytes, CD11b<sup>+</sup>Ly6C<sup>+</sup> cells, cDC1, cDC2, Tim4<sup>+</sup>CD206<sup>+</sup> KCs, Tim4<sup>+</sup>CD206<sup>hi</sup> KCs, Tim4-MHCIi<sup>+</sup> myeloid cells, Tim4-MHCIi<sup>-</sup> myeloid cells, NKT cells,  $\gamma\delta$ T cells, CD4<sup>+</sup> T cells, CD8<sup>+</sup> T cells, CD19<sup>+</sup> B cells, Nkp46<sup>+</sup> NK cells. c,d- Representative gating strategies for spleen red pulp macrophages (RPM), NKT cells, CD3<sup>+</sup> T cells,  $\gamma\delta$ T cells, CD8<sup>+</sup> T cells, CD4<sup>+</sup> T cells, Nkp46<sup>+</sup> NK cells, CD19<sup>+</sup> B cells. e,f- Representative gating strategies for blood, CD19<sup>+</sup> B cells, Nkp46<sup>+</sup> NK cells, CD3<sup>+</sup> T cells, Ly6G<sup>+</sup> granulocytes, Ly6C<sup>+</sup> monocytes,  $\gamma\delta$ T cells, CD4<sup>+</sup> T cells, CD8<sup>+</sup> T cells. Related to Figure 2b, 3c, 3d, 3e, 4i, 4k, 5g, 5i, 5j, 6h. Extended data Figure 1a, 1c, 1d, 1e, 1f, 1h, 1i, 2h, 2i, 2k, 2l, 2o, 5c, 5d, 6a, 6e, 6f, 6g, 7e, 7j, 10c.

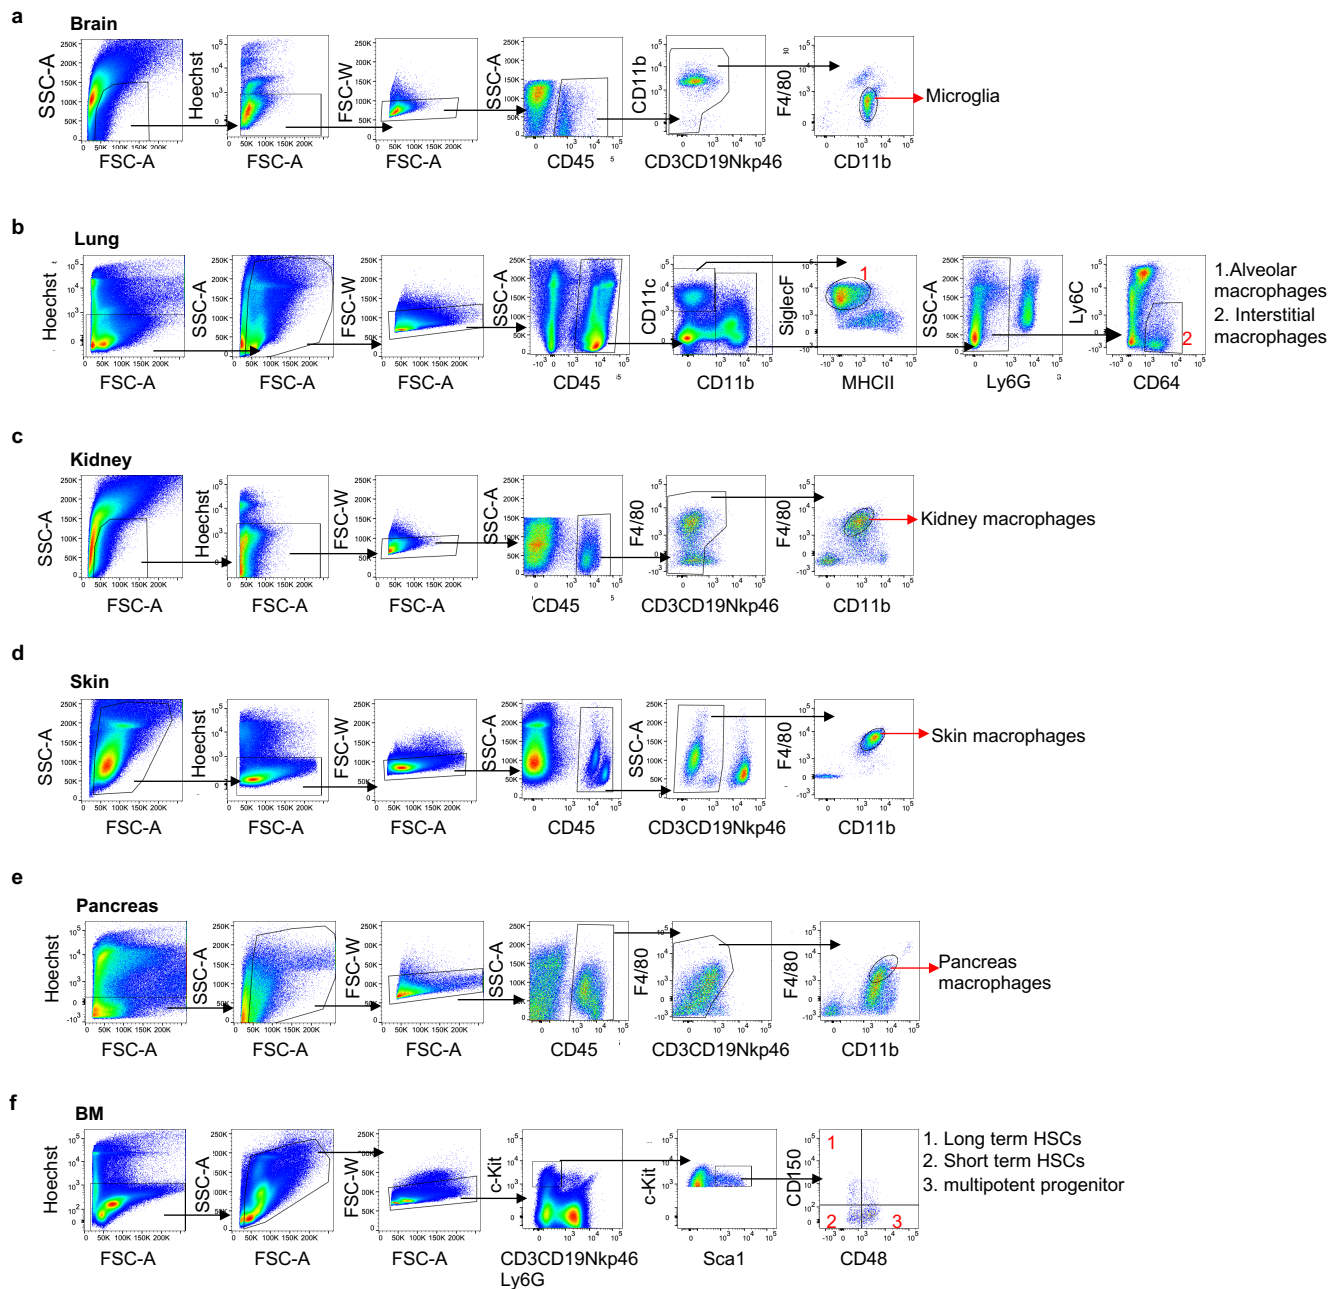

**Supplementary information figure 2. Flow cytometry gating strategies for macrophages in brain, lung, kidney, skin, pancreas, and hematopoietic stem cells in bone marrow.** a- Representative gating strategies for brain microglia cells. b- Representative gating strategies for Alveolar macrophages, Interstitial macrophages. c- Representative gating strategies for kidney macrophages. d- Representative gating strategies for skin macrophages. e- Representative gating strategies for pancreas macrophages. f- Representative gating strategies for bone marrow Long term hematopoietic stem cells(LT-HSCs), Short term hematopoietic stem cells(ST-HSCs), multipotent progenitor. Related to Extended data figure 1f, 2o.

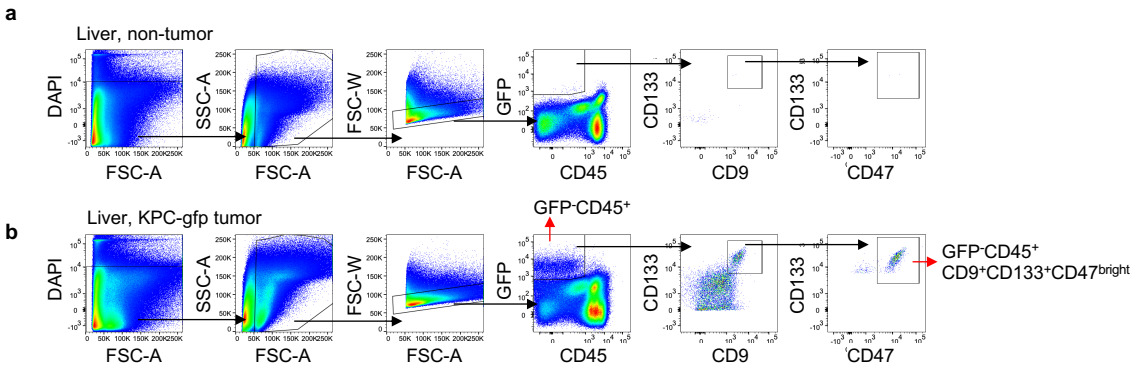

**Supplementary information figure 3. Flow cytometry gating strategies for GFP-CD45<sup>+</sup> tumor cells and GFP-CD45<sup>+</sup>CD9<sup>+</sup>CD133<sup>+</sup>CD47<sup>bright</sup> metastatic initiating tumor cells in tumor bearing liver.**

**a,b-** Representative gating strategies for GFP-CD45<sup>+</sup> tumor cells and GFP-CD45<sup>+</sup>CD9<sup>+</sup>CD133<sup>+</sup>CD47<sup>bright</sup> metastatic initiating tumor cells in liver from non-tumor bearing mice (**a**) or tumor bearing mice 2 weeks after intra-portal injection of KPC-gfp cells (**b**). Related to Figure 1h, 3i, 4f. Extended data Figure 1n, 5f.

| Figures                                                                   | Y title                                                                         | Group1                                                           | Group2                                                   | Group2 vs Group1 p Value. |
|---------------------------------------------------------------------------|---------------------------------------------------------------------------------|------------------------------------------------------------------|----------------------------------------------------------|---------------------------|
| Figure 1c                                                                 | Photo Radiance                                                                  | <i>Csf1<sup>fl/fl</sup> liver</i>                                | <i>Clec4f<sup>cre</sup> Csf1<sup>fl/fl</sup> liver</i>   | 2.9E-05                   |
| Figure 1e                                                                 | Photo Radiance                                                                  | <i>R26<sup>LSL-DTR</sup> liver</i>                               | <i>Clec4f<sup>cre</sup> R26<sup>LSL-DTR</sup> liver</i>  | 1.3E-06                   |
| Figure 1e                                                                 | Photo Radiance                                                                  | <i>R26<sup>LSL-DTR</sup> lung</i>                                | <i>Clec4f<sup>cre</sup> R26<sup>LSL-DTR</sup> lung</i>   | 2.0E-06                   |
| Figure 2b                                                                 | % Partner derived (45.1°)                                                       | Tim4 <sup>+</sup> No tumor                                       | Tim4 <sup>+</sup> MHCII <sup>+</sup> No tumor            | 8.4E-06                   |
| Figure 2d                                                                 | % Tim4 <sup>+</sup> tdT <sup>+</sup>                                            | >500µm                                                           | 0-50µm                                                   | 9.7E-06                   |
| Figure 2e                                                                 | tdT relative MFI                                                                | Lamp1 <sup>+</sup> lysosome                                      | Lamp1 <sup>+</sup> region                                | <1E-15                    |
| Figure 2h                                                                 | CCL3 Relative MFI                                                               | >50µm                                                            | 0-50µm                                                   | <1E-15                    |
|                                                                           | CCL3 Relative MFI                                                               | >50µm                                                            | core                                                     | <1E-15                    |
|                                                                           | CCL4 Relative MFI                                                               | >50µm                                                            | 0-50µm                                                   | <1E-15                    |
|                                                                           | CCL4 Relative MFI                                                               | >50µm                                                            | core                                                     | <1E-15                    |
|                                                                           | CCL5 Relative MFI                                                               | >50µm                                                            | 0-50µm                                                   | <1E-15                    |
|                                                                           | CCL5 Relative MFI                                                               | >50µm                                                            | core                                                     | <1E-15                    |
|                                                                           | CCL5 Relative MFI                                                               | 0-50µm                                                           | core                                                     | 2.5E-09                   |
|                                                                           | IL12P70 Relative MFI                                                            | >50µm                                                            | 0-50µm                                                   | <1E-15                    |
|                                                                           | IL12P70 Relative MFI                                                            | >50µm                                                            | core                                                     | <1E-15                    |
|                                                                           | IL12P70 Relative MFI                                                            | 0-50µm                                                           | core                                                     | <1E-15                    |
|                                                                           | IL15 Relative MFI                                                               | >50µm                                                            | 0-50µm                                                   | <1E-15                    |
|                                                                           | IL15 Relative MFI                                                               | >50µm                                                            | core                                                     | <1E-15                    |
|                                                                           | IL15 Relative MFI                                                               | 0-50µm                                                           | core                                                     | <1E-15                    |
|                                                                           | IL18 Relative MFI                                                               | >50µm                                                            | 0-50µm                                                   | <1E-15                    |
| IL18 Relative MFI                                                         | >50µm                                                                           | core                                                             | <1E-15                                                   |                           |
| Figure 2i                                                                 | CD8 <sup>+</sup> T cells. mm <sup>2</sup> (x10 <sup>3</sup> )                   | >50µm                                                            | 0-50µm                                                   | 2.2E-06                   |
| Figure 2j                                                                 | CD8 <sup>+</sup> T cells. mm <sup>2</sup> (x10 <sup>3</sup> )                   | 0-50µm                                                           | core                                                     | 1.7E-05                   |
| Figure 2j                                                                 | Nkp46 <sup>+</sup> Lamp1 <sup>+</sup> . mm <sup>2</sup> (x10 <sup>3</sup> )     | >50µm                                                            | 0-50µm                                                   | 8.2E-05                   |
| Figure 4d                                                                 | SIRPA relative MFI                                                              | <i>Id3<sup>fl/fl</sup> tumor</i>                                 | <i>Clec4f<sup>cre</sup> Id3<sup>fl/fl</sup> tumor</i>    | 4.9E-05                   |
|                                                                           | DECTIN1 relative MFI                                                            | <i>Id3<sup>fl/fl</sup> tumor</i>                                 | <i>Clec4f<sup>cre</sup> Id3<sup>fl/fl</sup> tumor</i>    | 2.1E-05                   |
| Figure 4e                                                                 | % Tim4 <sup>+</sup> GFP <sup>+</sup>                                            | <i>Id3<sup>fl/fl</sup> &gt;50µm</i>                              | <i>Id3<sup>fl/fl</sup> 0-50µm</i>                        | 1.0E-10                   |
|                                                                           | % Tim4 <sup>+</sup> GFP <sup>+</sup>                                            | <i>Id3<sup>fl/fl</sup> 50-500µm</i>                              | <i>Id3<sup>fl/fl</sup> 0-50µm</i>                        | 5.4E-09                   |
| Figure 4f                                                                 | % Tim4 <sup>+</sup> GFP <sup>+</sup>                                            | <i>Id3<sup>fl/fl</sup> 50-500µm</i>                              | <i>Clec4f<sup>cre</sup> Id3<sup>fl/fl</sup> 50-500µm</i> | 1.2E-05                   |
|                                                                           | % Tim4 <sup>+</sup> GFP <sup>+</sup>                                            | <i>Id3<sup>fl/fl</sup></i>                                       | <i>Clec4f<sup>cre</sup> Id3<sup>fl/fl</sup></i>          | 5.0E-05                   |
| Figure 4h                                                                 | CCL3 relative MFI                                                               | <i>Id3<sup>fl/fl</sup> &gt;50µm</i>                              | <i>Id3<sup>fl/fl</sup> 0-50µm</i>                        | <1E-15                    |
|                                                                           | CCL3 relative MFI                                                               | <i>Id3<sup>fl/fl</sup> &gt;50µm</i>                              | <i>Id3<sup>fl/fl</sup> core</i>                          | <1E-15                    |
|                                                                           | CCL3 relative MFI                                                               | <i>Id3<sup>fl/fl</sup> 0-50µm</i>                                | <i>Clec4f<sup>cre</sup> Id3<sup>fl/fl</sup> 0-50µm</i>   | <1E-15                    |
|                                                                           | CCL3 relative MFI                                                               | <i>Id3<sup>fl/fl</sup> core</i>                                  | <i>Clec4f<sup>cre</sup> Id3<sup>fl/fl</sup> core</i>     | <1E-15                    |
|                                                                           | CCL4 relative MFI                                                               | <i>Id3<sup>fl/fl</sup> &gt;50µm</i>                              | <i>Id3<sup>fl/fl</sup> 0-50µm</i>                        | <1E-15                    |
|                                                                           | CCL4 relative MFI                                                               | <i>Id3<sup>fl/fl</sup> &gt;50µm</i>                              | <i>Id3<sup>fl/fl</sup> core</i>                          | <1E-15                    |
|                                                                           | CCL4 relative MFI                                                               | <i>Id3<sup>fl/fl</sup> 0-50µm</i>                                | <i>Clec4f<sup>cre</sup> Id3<sup>fl/fl</sup> 0-50µm</i>   | <1E-15                    |
|                                                                           | CCL4 relative MFI                                                               | <i>Id3<sup>fl/fl</sup> core</i>                                  | <i>Clec4f<sup>cre</sup> Id3<sup>fl/fl</sup> core</i>     | <1E-15                    |
|                                                                           | CCL5 relative MFI                                                               | <i>Id3<sup>fl/fl</sup> &gt;50µm</i>                              | <i>Id3<sup>fl/fl</sup> 0-50µm</i>                        | <1E-15                    |
|                                                                           | CCL5 relative MFI                                                               | <i>Id3<sup>fl/fl</sup> &gt;50µm</i>                              | <i>Id3<sup>fl/fl</sup> core</i>                          | <1E-15                    |
|                                                                           | CCL5 relative MFI                                                               | <i>Id3<sup>fl/fl</sup> 0-50µm</i>                                | <i>Clec4f<sup>cre</sup> Id3<sup>fl/fl</sup> 0-50µm</i>   | <1E-15                    |
|                                                                           | CCL5 relative MFI                                                               | <i>Id3<sup>fl/fl</sup> core</i>                                  | <i>Clec4f<sup>cre</sup> Id3<sup>fl/fl</sup> core</i>     | <1E-15                    |
|                                                                           | IL12 relative MFI                                                               | <i>Id3<sup>fl/fl</sup> &gt;50µm</i>                              | <i>Id3<sup>fl/fl</sup> 0-50µm</i>                        | <1E-15                    |
|                                                                           | IL12 relative MFI                                                               | <i>Id3<sup>fl/fl</sup> &gt;50µm</i>                              | <i>Id3<sup>fl/fl</sup> core</i>                          | <1E-15                    |
|                                                                           | IL12 relative MFI                                                               | <i>Id3<sup>fl/fl</sup> 0-50µm</i>                                | <i>Clec4f<sup>cre</sup> Id3<sup>fl/fl</sup> 0-50µm</i>   | <1E-15                    |
|                                                                           | IL12 relative MFI                                                               | <i>Id3<sup>fl/fl</sup> core</i>                                  | <i>Clec4f<sup>cre</sup> Id3<sup>fl/fl</sup> core</i>     | <1E-15                    |
|                                                                           | IL15 relative MFI                                                               | <i>Id3<sup>fl/fl</sup> &gt;50µm</i>                              | <i>Id3<sup>fl/fl</sup> 0-50µm</i>                        | <1E-15                    |
|                                                                           | IL15 relative MFI                                                               | <i>Id3<sup>fl/fl</sup> &gt;50µm</i>                              | <i>Id3<sup>fl/fl</sup> core</i>                          | <1E-15                    |
| IL15 relative MFI                                                         | <i>Id3<sup>fl/fl</sup> 0-50µm</i>                                               | <i>Clec4f<sup>cre</sup> Id3<sup>fl/fl</sup> 0-50µm</i>           | <1E-15                                                   |                           |
| IL15 relative MFI                                                         | <i>Id3<sup>fl/fl</sup> core</i>                                                 | <i>Clec4f<sup>cre</sup> Id3<sup>fl/fl</sup> core</i>             | <1E-15                                                   |                           |
| IL18 relative MFI                                                         | <i>Id3<sup>fl/fl</sup> &gt;50µm</i>                                             | <i>Id3<sup>fl/fl</sup> 0-50µm</i>                                | <1E-15                                                   |                           |
| IL18 relative MFI                                                         | <i>Id3<sup>fl/fl</sup> &gt;50µm</i>                                             | <i>Id3<sup>fl/fl</sup> core</i>                                  | <1E-15                                                   |                           |
| IL18 relative MFI                                                         | <i>Id3<sup>fl/fl</sup> 0-50µm</i>                                               | <i>Clec4f<sup>cre</sup> Id3<sup>fl/fl</sup> 0-50µm</i>           | <1E-15                                                   |                           |
| IL18 relative MFI                                                         | <i>Id3<sup>fl/fl</sup> core</i>                                                 | <i>Clec4f<sup>cre</sup> Id3<sup>fl/fl</sup> core</i>             | <1E-15                                                   |                           |
| Figure 4i                                                                 | CD8 <sup>+</sup> cell / g (x10 <sup>5</sup> )                                   | <i>Id3<sup>fl/fl</sup></i>                                       | <i>Clec4f<sup>cre</sup> Id3<sup>fl/fl</sup></i>          | 3.5E-06                   |
| Figure 4j                                                                 | Nkp46 <sup>+</sup> Lamp1 <sup>+</sup> cells mm <sup>2</sup> (x10 <sup>3</sup> ) | <i>Id3<sup>fl/fl</sup> &gt;50µm</i>                              | <i>Id3<sup>fl/fl</sup> 0-50µm</i>                        | 2.8E-11                   |
|                                                                           | Nkp46 <sup>+</sup> Lamp1 <sup>+</sup> cells mm <sup>2</sup> (x10 <sup>3</sup> ) | <i>Id3<sup>fl/fl</sup> &gt;50µm</i>                              | <i>Id3<sup>fl/fl</sup> core</i>                          | 4.4E-08                   |
|                                                                           | Nkp46 <sup>+</sup> Lamp1 <sup>+</sup> cells mm <sup>2</sup> (x10 <sup>3</sup> ) | <i>Id3<sup>fl/fl</sup> 0-50µm</i>                                | <i>Clec4f<sup>cre</sup> Id3<sup>fl/fl</sup> 0-50µm</i>   | 3.2E-09                   |
|                                                                           | Nkp46 <sup>+</sup> Lamp1 <sup>+</sup> cells mm <sup>2</sup> (x10 <sup>3</sup> ) | <i>Id3<sup>fl/fl</sup> core</i>                                  | <i>Clec4f<sup>cre</sup> Id3<sup>fl/fl</sup> core</i>     | 2.3E-06                   |
|                                                                           | CD8 <sup>+</sup> T cells mm <sup>2</sup> (x10 <sup>3</sup> )                    | <i>Id3<sup>fl/fl</sup> &gt;50µm</i>                              | <i>Id3<sup>fl/fl</sup> 0-50µm</i>                        | <1E-15                    |
|                                                                           | CD8 <sup>+</sup> T cells mm <sup>2</sup> (x10 <sup>3</sup> )                    | <i>Id3<sup>fl/fl</sup> &gt;50µm</i>                              | <i>Id3<sup>fl/fl</sup> core</i>                          | 4.9E-10                   |
|                                                                           | CD8 <sup>+</sup> T cells mm <sup>2</sup> (x10 <sup>3</sup> )                    | <i>Id3<sup>fl/fl</sup> 0-50µm</i>                                | <i>Clec4f<sup>cre</sup> Id3<sup>fl/fl</sup> 0-50µm</i>   | <1E-15                    |
|                                                                           | CD8 <sup>+</sup> T cells mm <sup>2</sup> (x10 <sup>3</sup> )                    | <i>Id3<sup>fl/fl</sup> core</i>                                  | <i>Clec4f<sup>cre</sup> Id3<sup>fl/fl</sup> core</i>     | 1.0E-08                   |
|                                                                           | IL12b relative mRNA                                                             | wt                                                               | wt. KP C1 + IgG                                          | 5.9E-05                   |
|                                                                           | CD8 <sup>+</sup> T cells mm <sup>2</sup> (x10 <sup>3</sup> )                    | <i>Id3<sup>fl/fl</sup> + IgG &gt;50µm</i>                        | <i>Id3<sup>fl/fl</sup> + IgG 0-50µm</i>                  | 1.8E-14                   |
| CD8 <sup>+</sup> T cells mm <sup>2</sup> (x10 <sup>3</sup> )              | <i>Id3<sup>fl/fl</sup> + IgG &gt;50µm</i>                                       | <i>Id3<sup>fl/fl</sup> + IgG core</i>                            | 9.1E-09                                                  |                           |
| CD8 <sup>+</sup> T cells mm <sup>2</sup> (x10 <sup>3</sup> )              | <i>Id3<sup>fl/fl</sup> + IgG 0-50µm</i>                                         | <i>Id3<sup>fl/fl</sup> + IgG core</i>                            | 1.8E-14                                                  |                           |
| CD8 <sup>+</sup> T cells mm <sup>2</sup> (x10 <sup>3</sup> )              | <i>Id3<sup>fl/fl</sup> + IgG 0-50µm</i>                                         | <i>Clec4f<sup>cre</sup> Id3<sup>fl/fl</sup> + IgG 0-50µm</i>     | 1.8E-14                                                  |                           |
| CD8 <sup>+</sup> T cells mm <sup>2</sup> (x10 <sup>3</sup> )              | <i>Clec4f<sup>cre</sup> Id3<sup>fl/fl</sup> + IgG 0-50µm</i>                    | <i>Clec4f<sup>cre</sup> Id3<sup>fl/fl</sup> + α-SIRPA 0-50µm</i> | 1.8E-14                                                  |                           |
| CD8 <sup>+</sup> T cells mm <sup>2</sup> (x10 <sup>3</sup> )              | <i>Clec4f<sup>cre</sup> Id3<sup>fl/fl</sup> + IgG core</i>                      | <i>Clec4f<sup>cre</sup> Id3<sup>fl/fl</sup> + α-SIRPA core</i>   | 1.9E-07                                                  |                           |
| Nkp46 <sup>+</sup> Lamp1 <sup>+</sup> mm <sup>2</sup> (x10 <sup>3</sup> ) | <i>Id3<sup>fl/fl</sup> + IgG &gt;50µm</i>                                       | <i>Id3<sup>fl/fl</sup> + IgG 0-50µm</i>                          | 7.2E-14                                                  |                           |
| Nkp46 <sup>+</sup> Lamp1 <sup>+</sup> mm <sup>2</sup> (x10 <sup>3</sup> ) | <i>Id3<sup>fl/fl</sup> + IgG &gt;50µm</i>                                       | <i>Id3<sup>fl/fl</sup> + IgG core</i>                            | 2.6E-07                                                  |                           |
| Nkp46 <sup>+</sup> Lamp1 <sup>+</sup> mm <sup>2</sup> (x10 <sup>3</sup> ) | <i>Id3<sup>fl/fl</sup> + IgG 0-50µm</i>                                         | <i>Id3<sup>fl/fl</sup> + IgG core</i>                            | 3.8E-08                                                  |                           |
| Nkp46 <sup>+</sup> Lamp1 <sup>+</sup> mm <sup>2</sup> (x10 <sup>3</sup> ) | <i>Id3<sup>fl/fl</sup> + IgG 0-50µm</i>                                         | <i>Clec4f<sup>cre</sup> Id3<sup>fl/fl</sup> + IgG 0-50µm</i>     | 2.1E-09                                                  |                           |
| Nkp46 <sup>+</sup> Lamp1 <sup>+</sup> mm <sup>2</sup> (x10 <sup>3</sup> ) | <i>Clec4f<sup>cre</sup> Id3<sup>fl/fl</sup> + IgG 0-50µm</i>                    | <i>Clec4f<sup>cre</sup> Id3<sup>fl/fl</sup> + α-SIRPA 0-50µm</i> | 5.2E-09                                                  |                           |
| Nkp46 <sup>+</sup> Lamp1 <sup>+</sup> mm <sup>2</sup> (x10 <sup>3</sup> ) | <i>Clec4f<sup>cre</sup> Id3<sup>fl/fl</sup> + IgG core</i>                      | <i>Clec4f<sup>cre</sup> Id3<sup>fl/fl</sup> + α-SIRPA core</i>   | 2.0E-05                                                  |                           |
| Figure 5m                                                                 | SIRPA relative MFI                                                              | <i>Id3<sup>fl/fl</sup> Scramble</i>                              | <i>Id3<sup>fl/fl</sup> Scramble</i>                      | 1.0E-08                   |
|                                                                           | SIRPA relative MFI                                                              | <i>Id3<sup>fl/fl</sup> Scramble</i>                              | <i>Id3<sup>fl/fl</sup> sh-Elk1</i>                       | 6.7E-06                   |
|                                                                           | SIRPA relative MFI                                                              | <i>Id3<sup>fl/fl</sup> Scramble</i>                              | <i>Id3<sup>fl/fl</sup> sh-E2A</i>                        | 8.0E-06                   |
|                                                                           | SIRPA relative MFI                                                              | <i>Id3<sup>fl/fl</sup> Scramble</i>                              | <i>Id3<sup>fl/fl</sup> sh-Elk1</i>                       | 4.0E-10                   |
| Figure 5n                                                                 | SIRPA relative MFI                                                              | Control                                                          | Lenti-Id3                                                | 8.3E-14                   |
|                                                                           | SIRPA relative MFI                                                              | Scramble                                                         | sh-E2A                                                   | 1.1E-13                   |
| Figure 6b                                                                 | SIRPA relative MFI                                                              | Scramble                                                         | sh-Elk1                                                  | 7.5E-14                   |
|                                                                           | Dectn1 Relative mRNA                                                            | Lenti-Control                                                    | Lenti-hd3                                                | 4.8E-06                   |
| Figure 6c                                                                 | Ccl3 Relative mRNA                                                              | Lenti-hd3+nt                                                     | Lenti-hd3+Panc1                                          | 3.8E-08                   |
|                                                                           | Ccl3 Relative mRNA                                                              | Lenti-Ctr+Panc1                                                  | Lenti-hd3+Panc1                                          | 1.8E-06                   |
|                                                                           | Ccl4 Relative mRNA                                                              | Lenti-Ctr+nt                                                     | Lenti-Ctr+Panc1                                          | 2.2E-05                   |
|                                                                           | Ccl4 Relative mRNA                                                              | Lenti-hd3+nt                                                     | Lenti-hd3+Panc1                                          | 2.0E-07                   |
|                                                                           | IL15 Relative mRNA                                                              | Lenti-Ctr+nt                                                     | Lenti-Ctr+Panc1                                          | 4.2E-05                   |
|                                                                           | IL15 Relative mRNA                                                              | Lenti-hd3+nt                                                     | Lenti-hd3+Panc1                                          | 7.1E-07                   |
|                                                                           | IL18 Relative mRNA                                                              | Lenti-hd3+nt                                                     | Lenti-hd3+Panc1                                          | 2.8E-06                   |
| Figure 6d                                                                 | CFSE proliferation/%                                                            | Lenti-Ctr+Panc1                                                  | Lenti-hd3+Panc1                                          | 2.8E-06                   |
|                                                                           | CFSE proliferation/%                                                            | Lenti-hd3+nt                                                     | Lenti-hd3+Panc1                                          | 4.7E-07                   |
| Figure 6e                                                                 | hCD8 <sup>+</sup> T Cell IFN-γ relative MFI                                     | Lenti-Ctr+Panc1                                                  | Lenti-hd3+Panc1                                          | 1.0E-04                   |
|                                                                           | hCD8 <sup>+</sup> T Cell IFN-γ relative MFI                                     | Lenti-hd3+nt                                                     | Lenti-hd3+Panc1                                          | 3.8E-05                   |
|                                                                           | hCD56 <sup>+</sup> NK Cell IFN-γ relative MFI                                   | Lenti-hd3+nt                                                     | Lenti-hd3+Panc1                                          | 3.1E-05                   |
| Figure 6h                                                                 | Nkp46 <sup>+</sup> NK cells IFN-γ relative MFI                                  | BMDM Lenti ctrl                                                  | BMDM Lenti-mlD3                                          | 2.1E-05                   |
|                                                                           | CD8 <sup>+</sup> T cells IFN-γ relative MFI                                     | BMDM Lenti ctrl                                                  | BMDM Lenti-mlD3                                          | 3.2E-05                   |

**Supplementary information Table1. Statistical P value for main figures.**  
Statistical P values for indicated figures are shown. p<0.0001.

| Figures                 | Y title                                                                                 | Group1                                                                       | Group2                                                                       | Group2 vs Group1 p Value. |
|-------------------------|-----------------------------------------------------------------------------------------|------------------------------------------------------------------------------|------------------------------------------------------------------------------|---------------------------|
| Extended Data Figure 1j | Liver Tim4 <sup>+</sup> cells / g (x10 <sup>6</sup> )                                   | d0                                                                           | d0.5                                                                         | 7.6E-11                   |
|                         | Liver Tim4 <sup>+</sup> cells / g (x10 <sup>6</sup> )                                   | d0                                                                           | d1                                                                           | 6.2E-11                   |
|                         | Liver Tim4 <sup>+</sup> cells / g (x10 <sup>6</sup> )                                   | d0                                                                           | d7                                                                           | 2.4E-09                   |
|                         | Liver Tim4 <sup>+</sup> cells / g (x10 <sup>6</sup> )                                   | d0                                                                           | d14                                                                          | 4.4E-06                   |
| Extended Data Figure 1m | Oncosphere size $\mu\text{m}^2 \times 10^3$                                             | CD9 <sup>+</sup> CD133 <sup>+</sup>                                          | CD9 <sup>+</sup> CD133 <sup>-</sup>                                          | <1E-15                    |
| Extended Data Figure 2k | GFP <sup>+</sup> (%) in <i>Cx3cr1<sup>9b9a</sup></i> mice                               | Tim4 <sup>+</sup> no tumor                                                   | Tim4-MHCI1 <sup>+</sup> no tumor                                             | 5.1E-14                   |
|                         | GFP <sup>+</sup> (%) in <i>Cx3cr1<sup>9b9a</sup></i> mice                               | Tim4 <sup>+</sup> KPC-1                                                      | Tim4-MHCI1 <sup>+</sup> KPC-1                                                | 5.0E-14                   |
|                         | GFP <sup>+</sup> (%) in <i>Cxcr4<sup>9b9a</sup></i> mice                                | Tim4 <sup>+</sup> no tumor                                                   | Tim4-MHCI1 <sup>+</sup> no tumor                                             | 1.1E-05                   |
|                         | GFP <sup>+</sup> (%) in <i>Cxcr4<sup>9b9a</sup></i> mice                                | Tim4 <sup>+</sup> no tumor                                                   | Tim4-MHCI1 <sup>+</sup> no tumor                                             | 1.5E-05                   |
|                         | GFP <sup>+</sup> (%) in <i>Cxcr4<sup>9b9a</sup></i> mice                                | Tim4 <sup>+</sup> KPC-1                                                      | Tim4-MHCI1 <sup>+</sup> KPC-1                                                | 4.7E-08                   |
|                         | GFP <sup>+</sup> (%) in <i>Cxcr4<sup>9b9a</sup></i> mice                                | Tim4 <sup>+</sup> KPC-1                                                      | Tim4-MHCI1 <sup>+</sup> KPC-1                                                | 1.0E-05                   |
|                         | tdT <sup>+</sup> (%) in <i>Cxcr4<sup>CNEERT2 R26<sup>LSL4GT</sup></sup></i> 4OH-TAM @6w | Tim4 <sup>+</sup> no tumor                                                   | Tim4-MHCI1 <sup>+</sup> no tumor                                             | 2.8E-05                   |
|                         | tdT <sup>+</sup> (%) in <i>Cxcr4<sup>CNEERT2 R26<sup>LSL4GT</sup></sup></i> 4OH-TAM @6w | Tim4 <sup>+</sup> KPC-1                                                      | Tim4-MHCI1 <sup>+</sup> KPC-1                                                | 4.2E-10                   |
| Extended Data Figure 3g | MFI CK19 in Tim4 <sup>+</sup> cells                                                     | Control                                                                      | KPC #2                                                                       | 7.5E-13                   |
|                         | MFI CK19 in Tim4 <sup>+</sup> cells                                                     | Control                                                                      | KPC #3                                                                       | 5.6E-12                   |
| Extended Data Figure 5a | CCL3 Relative MFI in KCs                                                                | Control                                                                      | KPC                                                                          | <1E-15                    |
|                         | CCL4 Relative MFI in KCs                                                                | Control                                                                      | KPC                                                                          | <1E-15                    |
|                         | CCL5 Relative MFI in KCs                                                                | Control                                                                      | KPC                                                                          | <1E-15                    |
|                         | IL12 Relative MFI in KCs                                                                | Control                                                                      | KPC                                                                          | <1E-15                    |
|                         | IL15 Relative MFI in KCs                                                                | Control                                                                      | KPC                                                                          | <1E-15                    |
|                         | IL18 Relative MFI in KCs                                                                | Control                                                                      | KPC                                                                          | <1E-15                    |
| Extended Data Figure 6a | SIRPA relative MFI in Tim4 <sup>+</sup> CD206 <sup>hi</sup> cells                       | <i>Id3<sup>fl/fl</sup></i> no tumor                                          | <i>Clec4f<sup>C2m</sup> Id3<sup>fl/fl</sup></i> no tumor                     | 9.2E-06                   |
|                         | SIRPA relative MFI in Tim4 <sup>+</sup> CD206 <sup>hi</sup> cells                       | <i>Id3<sup>fl/fl</sup></i> KPC-1                                             | <i>Clec4f<sup>C2m</sup> Id3<sup>fl/fl</sup></i> KPC-1                        | 6.8E-07                   |
| Extended Data Figure 6i | <i>Il18</i> relative mRNA                                                               | <i>Id3<sup>fl/fl</sup></i> +nt                                               | <i>Id3<sup>fl/fl</sup></i> +KPC                                              | 3.8E-05                   |
|                         | <i>Il18</i> relative mRNA                                                               | <i>Id3<sup>fl/fl</sup></i> +KPC                                              | <i>Clec4f<sup>C2m</sup> Id3<sup>fl/fl</sup></i> +KPC                         | 8.3E-05                   |
| Extended Data Figure 6j | IFN- $\gamma$ relative MFI                                                              | <i>Id3<sup>fl/fl</sup></i> +nt                                               | <i>Id3<sup>fl/fl</sup></i> +KPC                                              | 8.1E-05                   |
| Extended Data Figure 7a | Dectin1 relative MFI                                                                    | <i>Clec4f<sup>C2m</sup> Id3<sup>fl/fl</sup></i> + a-IgG                      | <i>Clec4f<sup>C2m</sup> Id3<sup>fl/fl</sup></i> + a-SIRPA                    | 8.3E-06                   |
|                         | CCL3 relative MFI                                                                       | <i>Id3<sup>fl/fl</sup></i> + a-IgG 0-50 $\mu\text{m}$                        | <i>Clec4f<sup>C2m</sup> Id3<sup>fl/fl</sup></i> + a-IgG 0-50 $\mu\text{m}$   | 3.2E-14                   |
|                         | CCL3 relative MFI                                                                       | <i>Clec4f<sup>C2m</sup> Id3<sup>fl/fl</sup></i> + a-IgG 0-50 $\mu\text{m}$   | <i>Clec4f<sup>C2m</sup> Id3<sup>fl/fl</sup></i> + a-SIRPA 0-50 $\mu\text{m}$ | 4.8E-14                   |
|                         | CCL3 relative MFI                                                                       | <i>Id3<sup>fl/fl</sup></i> + a-IgG core                                      | <i>Clec4f<sup>C2m</sup> Id3<sup>fl/fl</sup></i> + a-IgG core                 | 4.6E-08                   |
|                         | CCL3 relative MFI                                                                       | <i>Clec4f<sup>C2m</sup> Id3<sup>fl/fl</sup></i> + a-IgG core                 | <i>Clec4f<sup>C2m</sup> Id3<sup>fl/fl</sup></i> + a-SIRPA core               | 3.0E-08                   |
|                         | CCL4 relative MFI                                                                       | <i>Id3<sup>fl/fl</sup></i> + a-IgG 0-50 $\mu\text{m}$                        | <i>Clec4f<sup>C2m</sup> Id3<sup>fl/fl</sup></i> + a-IgG 0-50 $\mu\text{m}$   | <1E-15                    |
|                         | CCL4 relative MFI                                                                       | <i>Clec4f<sup>C2m</sup> Id3<sup>fl/fl</sup></i> + a-IgG 0-50 $\mu\text{m}$   | <i>Clec4f<sup>C2m</sup> Id3<sup>fl/fl</sup></i> + a-SIRPA 0-50 $\mu\text{m}$ | 3.0E-14                   |
|                         | CCL4 relative MFI                                                                       | <i>Id3<sup>fl/fl</sup></i> + a-IgG core                                      | <i>Clec4f<sup>C2m</sup> Id3<sup>fl/fl</sup></i> + a-IgG core                 | <1E-15                    |
|                         | CCL4 relative MFI                                                                       | <i>Clec4f<sup>C2m</sup> Id3<sup>fl/fl</sup></i> + a-IgG core                 | <i>Clec4f<sup>C2m</sup> Id3<sup>fl/fl</sup></i> + a-SIRPA core               | <1E-15                    |
|                         | CCL5 relative MFI                                                                       | <i>Id3<sup>fl/fl</sup></i> + a-IgG 0-50 $\mu\text{m}$                        | <i>Clec4f<sup>C2m</sup> Id3<sup>fl/fl</sup></i> + a-IgG 0-50 $\mu\text{m}$   | <1E-15                    |
| CCL5 relative MFI       | <i>Clec4f<sup>C2m</sup> Id3<sup>fl/fl</sup></i> + a-IgG 0-50 $\mu\text{m}$              | <i>Clec4f<sup>C2m</sup> Id3<sup>fl/fl</sup></i> + a-SIRPA 0-50 $\mu\text{m}$ | <1E-15                                                                       |                           |
| CCL5 relative MFI       | <i>Id3<sup>fl/fl</sup></i> + a-IgG core                                                 | <i>Clec4f<sup>C2m</sup> Id3<sup>fl/fl</sup></i> + a-IgG core                 | 1.4E-11                                                                      |                           |
| CCL5 relative MFI       | <i>Clec4f<sup>C2m</sup> Id3<sup>fl/fl</sup></i> + a-IgG core                            | <i>Clec4f<sup>C2m</sup> Id3<sup>fl/fl</sup></i> + a-SIRPA core               | 1.2E-09                                                                      |                           |
| Extended Data Figure 7h | % Cells                                                                                 | KPC-Cd47 <sup>+/+</sup> qfp                                                  | KPC-Cd47 <sup>-</sup> tdT                                                    | 5.0E-07                   |
| Extended Data Figure 8g | SIRPA relative MFI                                                                      | WT PBS                                                                       | <i>Id3</i> deficient PBS                                                     | 3.8E-08                   |
|                         | SIRPA relative MFI                                                                      | <i>Id3</i> deficient PBS                                                     | <i>Id3</i> deficient LPS                                                     | 6.7E-05                   |
| Extended Data Figure 8h | SIRPA relative MFI                                                                      | Control PBS                                                                  | Control LPS                                                                  | 2.7E-14                   |
|                         | SIRPA relative MFI                                                                      | Control LPS                                                                  | LentHd3 LPS                                                                  | 1.9E-14                   |
|                         | SIRPA relative MFI                                                                      | Scramble LPS                                                                 | sh-E2A LPS                                                                   | 1.9E-14                   |
|                         | SIRPA relative MFI                                                                      | Scramble LPS                                                                 | sh-Ek1 LPS                                                                   | 1.9E-14                   |
| Extended Data Figure 9h | TIM4 Expression level (PDAC.)                                                           | KC                                                                           | TAMs                                                                         | 3.6E-86                   |
|                         | SIRPA Expression level (PDAC.)                                                          | KC                                                                           | TAMs                                                                         | 1.5E-12                   |
|                         | IL18 Expression level (PDAC.)                                                           | KC                                                                           | TAMs                                                                         | 3.7E-09                   |
|                         | TIM4 Expression level (CRC.)                                                            | KC                                                                           | TAMs                                                                         | 4.5E-12                   |
|                         | CCL3 Expression level (CRC.)                                                            | KC                                                                           | TAMs                                                                         | 6.4E-15                   |
|                         | CCL4 Expression level (CRC.)                                                            | KC                                                                           | TAMs                                                                         | 1.1E-26                   |

**Supplementary information Table2. Statistical P value for extended data figures.**  
Statistical P values for indicated figures are shown. p<0.0001.
