# Supplementary material for: The nuclear factor ID3 endows macrophages with a potent anti-tumour activity
Source: PubMed Central journal article supplement (PMC10881399; doi:10.1038/s41586-023-06950-4), 2024-02-07
Supplement: 41586_2023_6950_MOESM2_ESM.pdf [file 41586_2023_6950_MOESM2_ESM.pdf]

## Reporting Summary

Nature Portfolio wishes to improve the reproducibility of the work that we publish. This form provides structure for consistency and transparency in reporting. For further information on Nature Portfolio policies, see our [Editorial Policies](#) and the [Editorial Policy Checklist](#).

### Statistics

For all statistical analyses, confirm that the following items are present in the figure legend, table legend, main text, or Methods section.

n/a Confirmed

- The exact sample size ( $n$ ) for each experimental group/condition, given as a discrete number and unit of measurement
- A statement on whether measurements were taken from distinct samples or whether the same sample was measured repeatedly
- The statistical test(s) used AND whether they are one- or two-sided  
*Only common tests should be described solely by name; describe more complex techniques in the Methods section.*
- A description of all covariates tested
- A description of any assumptions or corrections, such as tests of normality and adjustment for multiple comparisons
- A full description of the statistical parameters including central tendency (e.g. means) or other basic estimates (e.g. regression coefficient) AND variation (e.g. standard deviation) or associated estimates of uncertainty (e.g. confidence intervals)
- For null hypothesis testing, the test statistic (e.g.  $F$ ,  $t$ ,  $r$ ) with confidence intervals, effect sizes, degrees of freedom and  $P$  value noted  
*Give  $P$  values as exact values whenever suitable.*
- For Bayesian analysis, information on the choice of priors and Markov chain Monte Carlo settings
- For hierarchical and complex designs, identification of the appropriate level for tests and full reporting of outcomes
- Estimates of effect sizes (e.g. Cohen's  $d$ , Pearson's  $r$ ), indicating how they were calculated

*Our web collection on [statistics for biologists](#) contains articles on many of the points above.*

### Software and code

Policy information about [availability of computer code](#)

#### Data collection

IVIS Spectrum for Bioluminescence imaging.  
Leica DM IL inverted phase contrast microscope for Oncosphere imaging.  
LSR Fortessa for Flow cytometry data.  
GUAVA easyCyte HT for cell numbers.  
Aria III BD cell sorter for cell sorting data.  
Quant Studio 6 Flex System for Q\_PCR data.  
Axio Lab.A1 microscope for Cytospin data.  
Zeiss LSM880 confocal microscope for Immunofluorescence ,wholemount imaging, time lapse imaging.  
HiSeq 4000 for RNAseq data.

#### Data analysis

In vitro Oncosphere formation: ImageJ1.51.  
Flow cytometry, cell sorting: FlowJo 10.6 .  
Cell counting: GUAVA easyCyte HT.  
Bioluminescence imaging: LivingImage 2.60.1.  
Immunofluorescence imaging, time lapse imaging: Imaris9.3.1.  
Single cell RNAseq:Seurat" package (4.3.0) ,R studio (4.2.0).  
BulkRNAseq:STAR v2.7.10a.DESeq2 1.34.0  
Identification of candidate functional E2A and ELK1 motifs:Python 3, Keras 2.3.1, tensorflow 2.1.0, scikit-learn 0.21.3, deeplift 0.6.10.0, biopython 1.76.

For manuscripts utilizing custom algorithms or software that are central to the research but not yet described in published literature, software must be made available to editors and reviewers. We strongly encourage code deposition in a community repository (e.g. GitHub). See the Nature Portfolio [guidelines for submitting code & software](#) for further information.

## Data

Policy information about [availability of data](#)

All manuscripts must include a [data availability statement](#). This statement should provide the following information, where applicable:

- Accession codes, unique identifiers, or web links for publicly available datasets
- A description of any restrictions on data availability
- For clinical datasets or third party data, please ensure that the statement adheres to our [policy](#)

Public data used in this study, Single-cell RNA-seq analysis: The CRC dataset:GSE146409, The PDAC dataset : GSE205013, the nontumor control dataset : GSE115469. Identification of candidate functional E2A and ELK1 motifs: GSE128338.mouse reference genome GRCm39.human protein atlas (<https://www.proteinatlas.org/>). All the codes, analyzed RDS files, and the original data sets are available via the following link (<https://doi.org/10.5281/zenodo.10121153>).Bulk RNAseq raw data are deposited to the GEO repository with GEO accession number: GSE234638

## Research involving human participants, their data, or biological material

Policy information about studies with [human participants or human data](#). See also policy information about [sex, gender \(identity/presentation\), and sexual orientation](#) and [race, ethnicity and racism](#).

|                                                                    |                                                                                                                                                                                                                                                                                                                                                              |
|--------------------------------------------------------------------|--------------------------------------------------------------------------------------------------------------------------------------------------------------------------------------------------------------------------------------------------------------------------------------------------------------------------------------------------------------|
| Reporting on sex and gender                                        | sex was not considered in this study                                                                                                                                                                                                                                                                                                                         |
| Reporting on race, ethnicity, or other socially relevant groupings | The study did not collect any information about race, ethnicity information                                                                                                                                                                                                                                                                                  |
| Population characteristics                                         | Patient1: Age62/M,cTxNxM1 (Stage IV). Treatment: Taxoprexin (4 cycles); PD; Gemcitabine (1 cycle). Mutation: Kras, p.G12D; TP53, p.T155P. Patient2: Age57/M, cT3NxM1 (Stage IV). Treatment: Taxoprexin (1 cycle); PD; Gemcitabine (4 cycles). Mutation: Kras, p.Q61H; TP53: p.L257P. Patient3: Age60/M, no treatment. Mutation: Kras, p.G12D; TP53, p.L344P. |
| Recruitment                                                        | Autopsy from diagnosed PDAC patients.                                                                                                                                                                                                                                                                                                                        |
| Ethics oversight                                                   | Human tissues were obtained with patient-informed consent and used under approval by the Institutional Review Boards from Memorial Sloan Kettering Cancer Center(IRB protocols #15-021).                                                                                                                                                                     |

Note that full information on the approval of the study protocol must also be provided in the manuscript.

## Field-specific reporting

Please select the one below that is the best fit for your research. If you are not sure, read the appropriate sections before making your selection.

- Life sciences  Behavioural & social sciences  Ecological, evolutionary & environmental sciences

For a reference copy of the document with all sections, see [nature.com/documents/nr-reporting-summary-flat.pdf](https://nature.com/documents/nr-reporting-summary-flat.pdf)

## Life sciences study design

All studies must disclose on these points even when the disclosure is negative.

|                 |                                                                                                                                                                                                                                                                                                                                                          |
|-----------------|----------------------------------------------------------------------------------------------------------------------------------------------------------------------------------------------------------------------------------------------------------------------------------------------------------------------------------------------------------|
| Sample size     | No statistical methods were used to predetermine sample size, Sample size for each experiment is indicated in the figures and figure legends. Sample sizes were estimated based on preliminary experiments, with an effort to achieve a minimum of n=3, mostly n=20 mice per treatment group, which proved sufficient to determine reproducible results. |
| Data exclusions | No data was excluded from the analysis presented in this study.                                                                                                                                                                                                                                                                                          |
| Replication     | All experiments were repeated multiple times with similar results. Replicates were stated in the Figure Legends and methods/Statistical analysis.Key Observations from RNA-seq studies have been validated with Flow cytometry and RT_qPCR.                                                                                                              |
| Randomization   | For in vivo experiments, mice were randomly assigned to different groups.                                                                                                                                                                                                                                                                                |
| Blinding        | For in-vivo study, blinding was performed during tumor cells injection and tumor burden measurements, For Bulk RNAseq, time lapse imaging, blinding was performed from sample collection to data analysis. For other experiments, investigators were not blind to group allocation as this information was essential for experiment conducting.          |

## Reporting for specific materials, systems and methods

## Materials & experimental systems

| n/a                                 | Involved in the study                                           |
|-------------------------------------|-----------------------------------------------------------------|
| <input type="checkbox"/>            | <input checked="" type="checkbox"/> Antibodies                  |
| <input type="checkbox"/>            | <input checked="" type="checkbox"/> Eukaryotic cell lines       |
| <input checked="" type="checkbox"/> | <input type="checkbox"/> Palaeontology and archaeology          |
| <input type="checkbox"/>            | <input checked="" type="checkbox"/> Animals and other organisms |
| <input checked="" type="checkbox"/> | <input type="checkbox"/> Clinical data                          |
| <input checked="" type="checkbox"/> | <input type="checkbox"/> Dual use research of concern           |
| <input checked="" type="checkbox"/> | <input type="checkbox"/> Plants                                 |

## Methods

| n/a                                 | Involved in the study                              |
|-------------------------------------|----------------------------------------------------|
| <input type="checkbox"/>            | <input checked="" type="checkbox"/> ChIP-seq       |
| <input type="checkbox"/>            | <input checked="" type="checkbox"/> Flow cytometry |
| <input checked="" type="checkbox"/> | <input type="checkbox"/> MRI-based neuroimaging    |

## Antibodies

### Antibodies used

Antibodies are listed in Supplementary table 5. The following antibodies were used in immunofluorescence assay.

Primary antibodies:

anti-mouse-F4/80-eF450/AF647/AF488/eF570(1:200, BM8, eBioscience),  
 anti-mouse Tim4-AF647/PE(1:200, RMT4-54, Biolegend),  
 anti-mouse CD45.1-AF488(1:200, A20, Biolegend),  
 Chicken-anti-GFP (1:500, A10262, Invitrogen, recognize YFP),  
 Rabbit-anti-RFP (1:200, 600-401-379, Rockland),  
 Goat-anti mouse Clec4f (1:200, AF2784, R&D system),  
 anti-mouse CCL3(1:200, 50-7532-82, Thermo Fisher Scientific),  
 anti-mouse CCL4(1:200, AF-451-NA, Thermo Fisher Scientific),  
 anti-mouse CCL5(1:200, 701030, Thermo Fisher Scientific),  
 anti-mouse IL12p70(1:200, MM121B, Thermo Fisher Scientific),  
 anti-mouse IL15(1:200, AF447-SP, Thermo Fisher Scientific),  
 anti-mouse IL18(1:200, PA5-79481, Thermo Fisher Scientific) antibodies,  
 anti-human CD14-AF488(1:200, 561706, BD),  
 sheep-anti-human CK19(1:200, AF3506, R&D system),  
 rabbit-anti-human Tim4(1:200, PA5-53346, Thermo Fisher Scientific),  
 Goat-anti-human IL12(1:200, AF-219-NA, R&D system),  
 Goat-anti-human IL18(1:200, AF2548, R&D system),  
 Mouse-anti-human IL15(1:200, MAB2471, R&D system),  
 Goat-anti-human CCL3(1:200, AF-270-NA, R&D system),  
 Goat-anti-human CCL4(1:200, AF-271-NA, R&D system),  
 Goat-anti-human CCL5(1:200, AF-278-NA, R&D system).

Secondary antibodies:

anti-chicken Alexa Fluor 488 (1:500; a11039, Thermo Fisher Scientific),  
 anti-rabbit Alexa Fluor 555 (1:500, A32794, Thermo Fisher Scientific),  
 anti-rabbit Alexa Fluor 647(1:500, A32795, Thermo Fisher Scientific),  
 anti-goat Alexa Fluor 555 (1:500; a32816, Thermo Fisher Scientific),  
 anti-goat Alexa Fluor 647(1:500; a21447, Thermo Fisher Scientific),  
 anti-goat Alexa Fluor 488 (1:500; a32814, Thermo Fisher Scientific),  
 anti-sheep Alexa Fluor 568(1:500, A21099, Thermo Fisher Scientific),  
 Streptavidin Alexa Fluor 647 (1:500; 405237, BioLegend).  
 anti-sheep Alexa Fluor 568(1:500, A21099, Thermo Fisher Scientific),  
 anti-mouse Alexa Fluor 555(1:500, A-31570, Thermo Fisher Scientific).

The following antibodies were used in Flow cytometry assay:

anti-mouse-CD45-APC-eF780(1:200, 30-F11, ebioscience),  
 anti-mouse-CD45.1-AF488/PE (1:200, A20, Biolegend),  
 anti-mouse-CD45.2-APC-cy7(1:200, 104, Biolegend),  
 anti-mouse-Tim4-AF647/PE(1:200, RMT4-54, Biolegend),  
 anti-mouse-CD11b-PE-Cy7(1:200, M1/70, BD Biosciences),  
 anti-mouse-F4/80-eF450/BV605(1:200, BM8, ebioscience),  
 anti-mouse-Gr1-BV711(1:200, RB6-8C5, BD Biosciences),  
 anti-mouse-I-A/I-E-AF700(1:200, M5/114.15.2, Biolegend),  
 anti-mouse-CD11c-BV605(1:200, N418, Biolegend),  
 anti-mouse-Ly6C-BV510/BV786/AF488(1:200, HK1.4, Biolegend),  
 anti-mouse-CD117 (c-KIT)-BV605(1:200, 2B8, BD Biosciences)  
 anti-mouse-CD64-BV711/APC(1:200, X54-5/7.1, Biolegend)  
 anti-mouse-CD115-BV605/APC(1:200, AFS98, Biolegend)  
 anti-mouse-CD19-BV711 (1:200, 1D3, Biolegend)  
 anti-mouse-CD19-BV711 (1:200, 1D3/CD19, Biolegend)  
 anti-mouse-CD3-BV711/BV421(1:200, 145-2C11, Biolegend)  
 anti-mouse-CD3-APC-eF780 (1:200, 145-2C11, ebioscience)  
 anti-mouse-CD335-AF647/BV711/percp-cy5.5 (1:200, 29A1.4, Biolegend)  
 anti-mouse-CD48-APC(1:200, HM48-1, Biolegend)  
 anti-mouse-CD150 (SLAM)-PE-Cy7(1:200, TC15-12F12.2, Biolegend)

anti-mouse-Siglec F-AF647/BV711(1:200,E50-2440,BD Biosciences)  
 anti-mouse-Ly6G-BV421/PE/Dazzle594(1:200,1A8,Biolegend)  
 anti-mouse-Sca1-BV421(1:200,D7,BD Biosciences)  
 anti-mouse-CD64-BV711(1:200,X54-5/7.1,Biolegend)  
 anti-mouse-CD16/32 (1:100, 93,Biolegend)  
 anti-mouse-CD47-FITC/PE/AF647(1:200,miap301,Biolegend)  
 anti-mouse-CD133-PE-Cy7(1:200,315-2C11,Biolegend)  
 anti-mouse-CD44-BV785(1:200,IM7,Biolegend)  
 anti-mouse-CD9-AF700(1:200,KMC 8,ebioscience)  
 anti-mouse-CD24-BV605(1:200,M1/69,Biolegend)  
 anti-mouse-Epcam-BV711(1:200,G8.8,Biolegend)  
 anti-mouse-Sirpa-AF488/PE/PE-Cy7 (1:200,P84,Biolegend)  
 anti-mouse-CD206-BV785(1:200,C068C2,Biolegend)  
 anti-mouse-Clec7a-PE/APC(1:200,RH1,Biolegend)  
 anti-mouse-CD1d PBS-57 tetrame-AF647(1:200,NIH Tetramer Core Facility)  
 anti-mouse-TCR $\beta$ -PE-Cy7(1:200,H57-597,BD Biosciences)  
 anti-mouse-TCR $\delta$ -BV786(1:200,GL3,BD Biosciences)  
 anti-mouse-CD4-BV421(1:200,RM4-5,Biolegend)  
 anti-mouse-CD8-BV605/AF647(1:200,53-6.7,Biolegend)  
 anti-mouse-IFN $\gamma$ -PE-Cy7(1:200,XMG1.2,Biolegend)  
 anti-mouse-TNF $\alpha$ -AF647(1:200,MP6-XT22,Biolegend)  
 anti-human-CD8-PE(1:200,SK1, Biolegend )  
 anti-human-CD56-PE(1:200,HCD56,Biolegend)  
 anti-human-IFN $\gamma$ -APC(1:200,B27,BD Biosciences)  
 anti-human-TNF $\alpha$ -BV650(1:200,MAb11,Biolegend)

## Validation

all antibodies used are commercially available and catalog numbers/clones are stated in Supplementary table 5, detailed as follow:  
 anti-mouse-CD45(30-F11,ebioscience) [https://www.thermofisher.com/antibody/product/CD45-Antibody-clone-30-F11-Monoclonal/47-0451-82?](https://www.thermofisher.com/antibody/product/CD45-Antibody-clone-30-F11-Monoclonal/47-0451-82?gclid=CjwKCAiA0syqBhBxEiwAeNx9N0Wh3nljQ1xtqQcJSwawK0O6o3sfnM6ldsEKicKH4aP4Jn5iVIWxEBoC1ZUQAvD_BwE&ef_id=CjwKCAiA0syqBhBxEiwAeNx9N0Wh3nljQ1xtqQcJSwawK0O6o3sfnM6ldsEKicKH4aP4Jn5iVIWxEBoC1ZUQAvD_BwE:G:s&s_kwid=AL1365213!278870232429!!lg!!!1454324556!63404918784&cid=bid_pca_frg_r01_co_cp1359_pjt0000_bid00000_ose_gaw_dy_pur_con)  
 gclid=CjwKCAiA0syqBhBxEiwAeNx9N0Wh3nljQ1xtqQcJSwawK0O6o3sfnM6ldsEKicKH4aP4Jn5iVIWxEBoC1ZUQAvD\_BwE:G:s&s\_kwid=AL1365213!278870232429!!lg!!!1454324556!63404918784&cid=bid\_pca\_frg\_r01\_co\_cp1359\_pjt0000\_bid00000\_ose\_gaw\_dy\_pur\_con  
 anti-mouse-CD45.1(A20,Biolegend) <https://www.biolegend.com/en-us/products/alexa-fluor-488-anti-mouse-cd45-1-antibody-3103>  
 anti-mouse-CD45.2(104,Biolegend) <https://www.biolegend.com/en-us/products/apc-cyanine7-anti-mouse-cd45-2-antibody-3906>  
 anti-mouse-Tim4(RMT4-54,Biolegend) <https://www.biolegend.com/en-us/products/alexa-fluor-647-anti-mouse-tim-4-antibody-5243>  
 anti-mouse-CD11b(M1/70,BD Biosciences) <https://wwwbdbiosciences.com/en-us/products/reagents/flow-cytometry-reagents/research-reagents/single-color-antibodies-ruo/pe-cy-7-rat-anti-cd11b.552850>  
 anti-mouse-F4/80(BM8,ebioscience) <https://www.thermofisher.com/antibody/product/F4-80-Antibody-clone-BM8-Monoclonal/48-4801-82>  
 anti-mouse-Gr1(RB6-8C5, BD Biosciences) <https://wwwbdbiosciences.com/en-us/products/reagents/flow-cytometry-reagents/research-reagents/single-color-antibodies-ruo/bv711-rat-anti-mouse-ly-6g-and-ly-6c.740658>  
 anti-mouse-I-A/I-E(M5/114.15.2,Biolegend) <https://www.biolegend.com/en-us/products/alexa-fluor-700-anti-mouse-i-a-i-e-antibody-3413>  
 anti-mouse-CD11c(N418,Biolegend) <https://www.biolegend.com/en-us/products/brilliant-violet-605-anti-mouse-cd11c-antibody-7865>  
 anti-mouse-Ly6C(HK1.4,Biolegend) <https://www.biolegend.com/en-us/products/brilliant-violet-785-anti-mouse-ly-6c-antibody-11982>  
 anti-mouse-CD117 (c-KIT)(2B8,BD Biosciences) <https://www.biolegend.com/en-us/products/brilliant-violet-605-anti-mouse-cd117-c-kit-antibody-16969>  
 anti-mouse-CD64(X54-5/7.1,Biolegend) <https://www.biolegend.com/en-us/products/brilliant-violet-711-anti-mouse-cd64-fcgmari-antibody-9920>  
 anti-mouse-CD115(AFS98,Biolegend) <https://www.biolegend.com/en-us/products/brilliant-violet-605-anti-mouse-cd115-csf-1r-antibody-9013>  
 anti-mouse-CD19(1D3,Biolegend) <https://wwwbdbiosciences.com/en-us/products/reagents/flow-cytometry-reagents/research-reagents/single-color-antibodies-ruo/bv711-rat-anti-mouse-cd19.563157>  
 anti-mouse-CD19(1D3/CD19,Biolegend) <https://www.biolegend.com/en-us/products/alexa-fluor-700-anti-mouse-cd19-antibody-22036>  
 anti-mouse-CD3(145-2C11,Biolegend) <https://www.biolegend.com/en-us/products/brilliant-violet-711-anti-mouse-cd3epsilon-antibody-11975>  
 anti-mouse-CD3(145-2C11,ebioscience) <https://www.thermofisher.com/antibody/product/CD3e-Antibody-clone-145-2C11-Monoclonal/47-0031-82>  
 anti-mouse-CD335 (NKp46,Biolegend) <https://wwwbdbiosciences.com/en-us/products/reagents/flow-cytometry-reagents/research-reagents/single-color-antibodies-ruo/bv711-rat-anti-mouse-cd335-nkp46.740822>  
 anti-mouse-CD48(29A1.4,Biolegend) <https://www.biolegend.com/en-us/products/apc-anti-mouse-cd48-antibody-3622>  
 anti-mouse-CD150 (SLAM)(TC15-12F12.2,Biolegend) <https://www.biolegend.com/en-us/products/pe-cyanine7-anti-mouse-cd150-slam-antibody-3056>  
 anti-mouse-Siglec F(E50-2440,BD Biosciences) <https://wwwbdbiosciences.com/en-us/products/reagents/flow-cytometry-reagents/research-reagents/single-color-antibodies-ruo/alexa-fluor-647-rat-anti-mouse-siglec-f.562680>  
 anti-mouse-Ly6G(1A8,Biolegend) <https://www.biolegend.com/en-us/products/pe-dazzle-594-anti-mouse-ly-6g-antibody-12246>  
 anti-mouse-Sca1(D7,BD Biosciences) <https://wwwbdbiosciences.com/en-us/products/reagents/flow-cytometry-reagents/research-reagents/single-color-antibodies-ruo/bv421-rat-anti-mouse-ly-6a-e.562729>  
 anti-mouse-CD64(X54-5/7.1,Biolegend) <https://www.biolegend.com/en-us/products/brilliant-violet-711-anti-mouse-cd64-fcgmari-antibody-9920>  
 anti-mouse-CD16/32 (93,Biolegend) <https://www.biolegend.com/en-us/products/purified-anti-mouse-cd16-32-antibody-190>  
 anti-mouse-CD47(miap301,Biolegend) <https://www.biolegend.com/en-us/products/pe-anti-mouse-cd47-antibody-4926>  
 anti-mouse-CD133(315-2C11,Biolegend) <https://www.biolegend.com/en-us/products/pe-cyanine7-anti-mouse-cd133-antibody-10193>

anti-mouse-CD44(IM7,Biolegend) <https://www.biolegend.com/en-us/products/brilliant-violet-785-anti-mouse-human-cd44-antibody-7959>

anti-mouse-CD9(KMC 8,ebioscience) <https://www.thermofisher.com/antibody/product/CD9-Antibody-clone-eBioKMC8-KMC8-Monoclonal/56-0091-82>

anti-mouse-CD24(M1/69, Biolegend) <https://www.biolegend.com/en-us/products/brilliant-violet-605-anti-mouse-cd24-antibody-9691>

anti-mouse-Epcam(G8.8,Biolegend) <https://www.biolegend.com/en-us/products/brilliant-violet-711-anti-mouse-cd326-ep-cam-antibody-13763>

anti-mouse-Sirpa(P84,Biolegend) <https://www.biolegend.com/en-us/products/alexa-fluor-488-anti-mouse-cd172a-sirpalph-antibody-14089>

anti-mouse-CD206(C068C2,Biolegend) <https://www.biolegend.com/en-us/products/brilliant-violet-785-anti-mouse-cd206-mm-antibody-12013>

anti-mouse-Clec7a(RH1,Biolegend) <https://www.biolegend.com/en-us/products/pe-anti-mouse-cd369-dectin-1-clec7a-antibody-8102>

anti-mouse-TCRβ(H57-597,BD Biosciences) <https://www.bdbiosciences.com/en-us/products/reagents/flow-cytometry-reagents/research-reagents/single-color-antibodies-ruo/pe-cy-7-hamster-anti-mouse-tcr-chain.560729>

anti-mouse-TCRγδ(GL3,BD Biosciences) <https://www.bdbiosciences.com/en-us/products/reagents/flow-cytometry-reagents/research-reagents/single-color-antibodies-ruo/bv786-hamster-anti-mouse-t-cell-receptor.744117>

anti-mouse-CD4(RM4-5,Biolegend) <https://www.biolegend.com/en-us/products/brilliant-violet-421-anti-mouse-cd4-antibody-7349>

anti-mouse-CD8(53-6.7,Biolegend) <https://www.biolegend.com/en-us/products/brilliant-violet-605-anti-mouse-cd8a-antibody-7636>

anti-mouse-IFNγ(XMG1.2,Biolegend) <https://www.biolegend.com/en-us/products/pe-cyanine7-anti-mouse-ifn-gamma-antibody-5865>

anti-mouse-TNFα(MP6-XT22,Biolegend) <https://www.biolegend.com/en-us/products/alexa-fluor-647-anti-mouse-tnf-alpha-antibody-2724>

anti-human-CD8(SK1,Biolegend ) <https://www.biolegend.com/en-us/products/pe-anti-human-cd8-antibody-6247>

anti-human-CD56(HCD56,Biolegend) <https://www.biolegend.com/en-us/products/pe-anti-human-cd56-ncam-antibody-3796>

anti-human-IFNγ(B27,BD Biosciences) <https://www.bdbiosciences.com/en-us/products/reagents/flow-cytometry-reagents/research-reagents/single-color-antibodies-ruo/apc-mouse-anti-human-ifn.562017>

anti-human-TNFα(MAb11,Biolegend) <https://www.biolegend.com/en-us/products/brilliant-violet-650-anti-human-tnf-alpha-antibody-7680>

Rabbit-anti-mouse-Lamp1(ab24170,Abcam) <https://www.abcam.com/products/primary-antibodies/lamp1-antibody-lysosome-marker-ab24170.html>

Rat-anti-mouse-Lamp1(1D4B,Biolegend) <https://www.biolegend.com/en-us/products/alexa-fluor-647-anti-mouse-cd107a-lamp-1-antibody-3589>

Goat-anti-mouse-Clec4f(AF2784,R&D system) [https://www.rndsystems.com/products/mouse-clec4f-clecsf13-antibody\\_af2784?gclid=CjwKCAiA0syqBhBxEiwAeNx9NzuVAyZtHcQ2t2mAX-HxQZON-V4an6sh-7454lXYNRAJ5N6vegIKKxoCHHsQAvD\\_BwE&gclid=aw.ds](https://www.rndsystems.com/products/mouse-clec4f-clecsf13-antibody_af2784?gclid=CjwKCAiA0syqBhBxEiwAeNx9NzuVAyZtHcQ2t2mAX-HxQZON-V4an6sh-7454lXYNRAJ5N6vegIKKxoCHHsQAvD_BwE&gclid=aw.ds)

Rabbit-anti-mouse-Elk1(9182S,Cell signaling technology) <https://www.cellsignal.com/products/primary-antibodies/elk-1-antibody/9182>

Rat-anti-mouse-CCL3(50-7532-82,Thermo Fisher Scientific) <https://www.thermofisher.com/antibody/product/CCL3-MIP-1-alpha-Antibody-clone-DNT3CC-Monoclonal/50-7532-82>

Goat-anti-mouse-CCL4(AF-451-NA,R&D system) [https://www.rndsystems.com/products/mouse-ccl4-mip-1beta-antibody\\_af-451-na?gclid=CjwKCAiA0syqBhBxEiwAeNx9N83iPzTpnzHXEO1KGjN-zOqiuMOP4ewN1ty2NgN0GAz7s691FOeLxoC8TAQAvD\\_BwE&gclid=aw.ds](https://www.rndsystems.com/products/mouse-ccl4-mip-1beta-antibody_af-451-na?gclid=CjwKCAiA0syqBhBxEiwAeNx9N83iPzTpnzHXEO1KGjN-zOqiuMOP4ewN1ty2NgN0GAz7s691FOeLxoC8TAQAvD_BwE&gclid=aw.ds)

Rabbit-anti-mouse-CCL5(701030,Thermo Fisher Scientific) <https://www.thermofisher.com/antibody/product/CCL5-RANTES-Antibody-clone-25H14L17-Recombinant-Monoclonal/701030>

Rat-anti-mouse-IL12p70(MM121B,Thermo Fisher Scientific) <https://www.thermofisher.com/antibody/product/IL-12-p70-Antibody-clone-C17-8-Monoclonal/MM121B>

Goat-anti-mouse-IL15(AF447-SP,R&D system) [https://www.rndsystems.com/products/mouse-il-15-antibody\\_af447](https://www.rndsystems.com/products/mouse-il-15-antibody_af447)

Rabbit-anti-mouse-IL18(PA5-79481) <https://www.thermofisher.com/antibody/product/IL-18-Antibody-Polyclonal/PA5-79481>

Mouse-anti-human CD14(M5E2,BD Biosciences) <https://www.bdbiosciences.com/en-us/products/reagents/flow-cytometry-reagents/research-reagents/single-color-antibodies-ruo/alexa-fluor-488-mouse-anti-human-cd14.561706>

Rabbit-anti-human TIMD4(PA5-53346,Thermo Fisher Scientific) <https://www.thermofisher.com/antibody/product/TIMD4-Antibody-Polyclonal/PA5-53346>

Sheep-anti-human CK19(AF3506,R&D system) [https://www.rndsystems.com/products/human-cytokeratin-19-antibody\\_af3506](https://www.rndsystems.com/products/human-cytokeratin-19-antibody_af3506)

Mouse-anti-human CK19(ab7754,Abcam) [https://www.abcam.com/products?keywords=Cytokeratin+19&gad=1&gclid=CjwKCAiA0syqBhBxEiwAeNx9N3BdLDzd2ZIGgf3XWLLxor2FvGnraTGiBfPLZzOdH6LyL-Ky5C8URoCPIQAvD\\_BwE&gclid=aw.ds](https://www.abcam.com/products?keywords=Cytokeratin+19&gad=1&gclid=CjwKCAiA0syqBhBxEiwAeNx9N3BdLDzd2ZIGgf3XWLLxor2FvGnraTGiBfPLZzOdH6LyL-Ky5C8URoCPIQAvD_BwE&gclid=aw.ds)

Goat-anti-human IL12(AF-219-NA,R&D system) [https://www.rndsystems.com/products/human-il-12-antibody\\_af-219-na](https://www.rndsystems.com/products/human-il-12-antibody_af-219-na)

Goat-anti-human IL18(AF2548,R&D system) [https://www.rndsystems.com/products/human-rhesus-macaque-il-18-il-1f4-antibody\\_af2548](https://www.rndsystems.com/products/human-rhesus-macaque-il-18-il-1f4-antibody_af2548)

Mouse-anti-human IL15(MAB2471,R&D system) [https://www.rndsystems.com/products/human-il-15-antibody-34559\\_mab2471](https://www.rndsystems.com/products/human-il-15-antibody-34559_mab2471)

Goat-anti-human CCL3(AF-270-NA,R&D system) [https://www.rndsystems.com/products/human-ccl3-mip-1alpha-antibody\\_af-270-na](https://www.rndsystems.com/products/human-ccl3-mip-1alpha-antibody_af-270-na)

Goat-anti-human CCL4(AF-271-NA,R&D system) [https://www.rndsystems.com/products/human-ccl4-mip-1beta-antibody\\_af-271-na](https://www.rndsystems.com/products/human-ccl4-mip-1beta-antibody_af-271-na)

Goat-anti-human CCL5(AF-278-NA,R&D system) [https://www.rndsystems.com/products/human-ccl5-rantes-antibody\\_af-278-na](https://www.rndsystems.com/products/human-ccl5-rantes-antibody_af-278-na)

Goat anti-rabbit IgG(a11034,Thermo Fisher Scientific) <https://www.thermofisher.com/antibody/product/Goat-anti-Rabbit-IgG-H-L-Highly-Cross-Adsorbed-Secondary-Antibody-Polyclonal/A-11034>

Goat anti-rabbit IgG(a32795,Thermo Fisher Scientific) <https://www.thermofisher.com/antibody/product/Donkey-anti-Rabbit-IgG-H-L-Highly-Cross-Adsorbed-Secondary-Antibody-Polyclonal/A32795>

Goat anti-rabbit IgG(a21430,Thermo Fisher Scientific) <https://www.thermofisher.com/antibody/product/Goat-anti-Rabbit-IgG-H-L-Cross-Adsorbed-Secondary-Antibody-Polyclonal/A-21430>

Donkey anti-goat IgG(a32816,Thermo Fisher Scientific) <https://www.thermofisher.com/antibody/product/Donkey-anti-Goat-IgG-H-L-Highly-Cross-Adsorbed-Secondary-Antibody-Polyclonal/A32816>

Donkey anti-goat IgG(a32814,Thermo Fisher Scientific) <https://www.thermofisher.com/antibody/product/Donkey-anti-Goat-IgG-H-L-Highly-Cross-Adsorbed-Secondary-Antibody-Polyclonal/A32814>

Donkey anti-goat IgG(a21447,Thermo Fisher Scientific) <https://www.thermofisher.com/antibody/product/Donkey-anti-Goat-IgG-H-L-Cross-Adsorbed-Secondary-Antibody-Polyclonal/A-21447>

Goat-anti-Chicken IgG(A11039,Thermo Fisher Scientific) <https://www.thermofisher.com/antibody/product/Goat-anti-Chicken-IgY-H-L-Secondary-Antibody-Polyclonal/A-11039>  
 Donkey anti-Sheep IgG(A21099,Thermo Fisher Scientific) <https://www.thermofisher.com/antibody/product/Donkey-anti-Sheep-IgG-H-L-Cross-Adsorbed-Secondary-Antibody-Polyclonal/A-21099>  
 Donkey anti-Rabbit IgG (A32795,Thermo Fisher Scientific) <https://www.thermofisher.com/antibody/product/Donkey-anti-Rabbit-IgG-H-L-Highly-Cross-Adsorbed-Secondary-Antibody-Polyclonal/A32795>  
 Donkey anti-Rabbit IgG (A32794,Thermo Fisher Scientific) <https://www.thermofisher.com/antibody/product/Donkey-anti-Rabbit-IgG-H-L-Highly-Cross-Adsorbed-Secondary-Antibody-Polyclonal/A32794>  
 Donkey anti-Mouse IgG(A32766TR,Thermo Fisher Scientific) <https://www.thermofisher.com/antibody/product/Donkey-anti-Mouse-IgG-H-L-Highly-Cross-Adsorbed-Secondary-Antibody-Polyclonal/A32766TR>  
 Donkey anti-Mouse IgG(A-31570,Thermo Fisher Scientific) <https://www.thermofisher.com/antibody/product/Donkey-anti-Mouse-IgG-H-L-Highly-Cross-Adsorbed-Secondary-Antibody-Polyclonal/A-31570>  
 Streptavidin(405237,BioLegend) <https://www.biolegend.com/en-us/products/alexa-fluor-647-streptavidin-9305>  
 Chicken-anti-GFP(A10262,Thermo Fisher Scientific) <https://www.thermofisher.com/antibody/product/GFP-Antibody-Polyclonal/A10262>  
 Rabbit-anti-RFP(600-401-379,Rockland) <https://www.rockland.com/categories/primary-antibodies/rfp-antibody-pre-adsorbed-600-401-379/>  
 gad=1&gclid=CjwKCAiA0syqBhBxEiwAeNx9N5tsuMVfBce23BzyQPumvdS86suX3gpnUnuEkHqWfhXC07qhZyY\_RRoC\_fmQAvD\_BwE anti-mouse Dectin1(blockage)(R1-8g7,InvivoGen) <https://www.invivogen.com/anti-mdectin1>  
 anti-mouse-NK1.1(blockage)(BE0036,BioXcell) [https://bioxcell.com/invivomab-anti-mouse-nk1-1-be0036?](https://bioxcell.com/invivomab-anti-mouse-nk1-1-be0036?gad=1&gclid=CjwKCAiA0syqBhBxEiwAeNx9Nxt8Qgd8eOvuEcllXGCPcifYhuEIX_wLypwqhbWJP5c7r1yn7QPJPBoCtVgQAvD_BwE)  
 anti-mouse-CD8a(blockage)(BP0061,BioXcell) <https://bioxcell.com/invivoplus-anti-mouse-cd8-alpha-bp0061>  
 Control IgG(HRPN,BioXcell) <https://bioxcell.com/invivomab-rat-igg1-isotype-control-anti-horseradish-peroxidase-be0088>  
 Sirpa(P84,BioXcell) <https://bioxcell.com/invivomab-anti-mouse-cd172a-sirp-alpha-be0322>

## Eukaryotic cell lines

Policy information about [cell lines and Sex and Gender in Research](#)

|                                                                      |                                                                                                                                                                            |
|----------------------------------------------------------------------|----------------------------------------------------------------------------------------------------------------------------------------------------------------------------|
| Cell line source(s)                                                  | Mouse cell lines: KPC-1, KPC-2,PAN02,MC38,B16F10,LLC1.Human cell lines: PANC-1. KPC-1,2 cancer cell lines derived from KPC pancreatic tumors by passaging in cell culture. |
| Authentication                                                       | Morphology , antibodies stain and PCR validate cell lines.                                                                                                                 |
| Mycoplasma contamination                                             | No contamination                                                                                                                                                           |
| Commonly misidentified lines<br>(See <a href="#">ICLAC</a> register) | No commonly misidentified lines.                                                                                                                                           |

## Animals and other research organisms

Policy information about [studies involving animals; ARRIVE guidelines](#) recommended for reporting animal research, and [Sex and Gender in Research](#)

|                         |                                                                                                                                                                                                                                                                                                                                                                                                                                                                                                                                          |
|-------------------------|------------------------------------------------------------------------------------------------------------------------------------------------------------------------------------------------------------------------------------------------------------------------------------------------------------------------------------------------------------------------------------------------------------------------------------------------------------------------------------------------------------------------------------------|
| Laboratory animals      | Materials and Methods/Mice.Rosa26LSL-YFP , Rosa26LSL-tdT , Flt3Cre , Id3f/f , Id3-/- , Cx3cr1gfp/+ , CCR2-/- , Csf1rf/f , Spi1f/f , Cxcr4 gfp/+ , Cxcr4CreERT2 , Clec4fCre-tdT , Rosa26LSL-DTR , p48Cre , p53LSL-R172H , KrasLSL-G12D,CD45.1,C57BL/6J,Mice were housed in groups of no more than 5 per cage in standard closed plastic cages containing bedding, food and water. The room is controlled at stable temperature ~21-22°C with 30-70% humidity, 12light/12dark cycle(on from 6:00-18:00), 10-15 fresh air exchanges hourly. |
| Wild animals            | No wild animals were employed in the study.                                                                                                                                                                                                                                                                                                                                                                                                                                                                                              |
| Reporting on sex        | Sex was not considered in this study.                                                                                                                                                                                                                                                                                                                                                                                                                                                                                                    |
| Field-collected samples | No field-collected samples were used in this study.                                                                                                                                                                                                                                                                                                                                                                                                                                                                                      |
| Ethics oversight        | Materials and Methods/Mice. Animal procedures were performed in adherence with the Institutional Review Board (IACUC 15-04-006) at Memorial Sloan Kettering Cancer Center (MSKCC).                                                                                                                                                                                                                                                                                                                                                       |

Note that full information on the approval of the study protocol must also be provided in the manuscript.

## Plants

|                       |      |
|-----------------------|------|
| Seed stocks           | N.A. |
| Novel plant genotypes | N.A. |
| Authentication        | N.A. |

## ChIP-seq

### Data deposition

- Confirm that both raw and final processed data have been deposited in a public database such as [GEO](#).
- Confirm that you have deposited or provided access to graph files (e.g. BED files) for the called peaks.

|                                                                    |                                                 |
|--------------------------------------------------------------------|-------------------------------------------------|
| Data access links<br><i>May remain private before publication.</i> | CHIPseq data are shown in Extended data Fig8c,d |
| Files in database submission                                       | Available in GEO:GSE128338. ref.PMID: 32362324. |
| Genome browser session<br>(e.g. <a href="#">UCSC</a> )             | UCSC                                            |

### Methodology

|                         |                                                                                                                                                                                                                                       |
|-------------------------|---------------------------------------------------------------------------------------------------------------------------------------------------------------------------------------------------------------------------------------|
| Replicates              | Materials and Methods/Identification of candidate functional E2A and ELK1 motifs.                                                                                                                                                     |
| Sequencing depth        | libraries were size selected 250-500 bp using gel extraction using 10% TBE acrylamide gels. Libraries were single-end sequenced using either a HiSeq 4000 or a NextSeq 500 to a depth of 10-20 million reads.                         |
| Antibodies              | Antibodies are shown in ref.PMID: 32362324.                                                                                                                                                                                           |
| Peak calling parameters | Peak files were merged with HOMER's mergePeaks and annotated with raw tag counts with HOMER's annotatePeaks using parameters -noadj, -size given. To annotate H3K27ac signal around ATAC-seq peaks the parameter -size 2000 was used. |
| Data quality            | DESeq2 was used to identify the differentially bound H3K27ac signal or chromatin accessibility with FC > 2 and p-adj < 0.05. D                                                                                                        |
| Software                | Materials and Methods/Identification of candidate functional E2A and ELK1 motifs.                                                                                                                                                     |

## Flow Cytometry

### Plots

Confirm that:

- The axis labels state the marker and fluorochrome used (e.g. CD4-FITC).
- The axis scales are clearly visible. Include numbers along axes only for bottom left plot of group (a 'group' is an analysis of identical markers).
- All plots are contour plots with outliers or pseudocolor plots.
- A numerical value for number of cells or percentage (with statistics) is provided.

### Methodology

|                           |                                                                                                       |
|---------------------------|-------------------------------------------------------------------------------------------------------|
| Sample preparation        | Materials and Methods/Flow cytometry, cell sorting, cell counting.                                    |
| Instrument                | Flow cytometry was performed using a BD Biosciences LSRFortessa flow cytometer with Diva software.    |
| Software                  | All data were analyzed using FlowJo 10.6 (Tree Star Inc.).                                            |
| Cell population abundance | The purity of sorted samples was analyzed by flow cytometry on the same instruments used for sorting. |

Gating strategy

Materials and Methods/Flow cytometry, cell sorting, cell counting/Gating strategy. Extended Data Fig1e, Extended Data Fig2j, Supplementary information Figure 1, 2, 3.

Tick this box to confirm that a figure exemplifying the gating strategy is provided in the Supplementary Information.
